# Supplementary material for: Experimental probing of dynamic self-organized columnar assemblies in colloidal liquid crystals
Source: Royal Society of Chemistry journal article supplement (doi:10.1039/d3na00183k), 2023-01-01
Supplement: d3na00183k1.pdf [file d3na00183k1.pdf]

## Electronic Supplementary Information

### **Experimental probing of dynamic self-organized columnar assemblies in colloidal liquid crystals**

Taiki Hoshino<sup>a,b,c\*†</sup>, Masanari Nakayama<sup>d\*†</sup>, Yoshihiro Hosokawa<sup>d</sup>, Kohei Mochizuki<sup>d</sup>, Satoshi Kajiyama<sup>d</sup>,  
Yoshiki Kohmura<sup>b</sup>, Takashi Kato<sup>d,e\*</sup>

<sup>a</sup> International Center for Synchrotron Radiation Innovation Smart (SRIS), Tohoku University, 2-1-1  
Katahira, Aoba-ku, Sendai 980-8577, Japan

<sup>b</sup> RIKEN SPring-8 Center, 1-1-1, Kouto, Sayo-cho, Sayo-gun, Hyogo 679-5148, Japan

<sup>c</sup> Institute of Multidisciplinary Research for Advanced Materials (IMRAM), Tohoku University, 2-1-1  
Katahira, Aoba-ku, Sendai 980-8577, Japan

<sup>d</sup> Department of Chemistry and Biotechnology, School of Engineering, The University of Tokyo, Tokyo 113-  
8656, Japan

<sup>e</sup> Research Initiative for Supra-Materials, Shinshu University, 4-17-1, Wakasato, Nagano, Japan

† Equal Contribution

\*Taiki Hoshino

**Email:** taiki.hoshino.c7@tohoku.ac.jp

\*Masanari Nakayama

**Email:** masanarinakayama@gmail.com

\*Takashi Kato

**Email:** kato@chiral.t.u-tokyo.ac.jp

## Contents

|                                                                                                                                                                                                                                                                                  |   |
|----------------------------------------------------------------------------------------------------------------------------------------------------------------------------------------------------------------------------------------------------------------------------------|---|
| 1. <b>Fig. S1</b> SEM image of 2D templates prepared in the presence of 0.14 wt% PAA.....                                                                                                                                                                                        | 3 |
| 2. <b>Fig. S2</b> XRD patterns of 2D templates prepared in the presence of different PAA concentrations of 0 wt%, 0.14 wt% and 0.29 wt%. .....                                                                                                                                   | 3 |
| 3. <b>Fig. S3</b> TG curve of the 2D templates prepared in the presence of 0.14 wt% PAA.....                                                                                                                                                                                     | 4 |
| 4. <b>Fig. S4</b> TEM image and EDS elemental mapping images of a 2D template prepared in the presence of 0.14 wt% PAA. ....                                                                                                                                                     | 4 |
| 5. <b>Fig. S5</b> Time-dependent evolutions of XRD patterns and FTIR spectra for precipitates collected at different crystallization times after the addition of Na <sub>2</sub> CO <sub>3</sub> into a dispersion of Ca <sup>2+</sup> layers inside the organic templates. .... | 5 |
| 6. <b>Fig. S6</b> SEM images of precipitates prepared at different PAA concentrations.....                                                                                                                                                                                       | 5 |
| 7. <b>Fig. S7</b> TG curve of wide-disperse nanoplates after drying.....                                                                                                                                                                                                         | 6 |
| 8. <b>Fig. S8</b> TEM image and EDS elemental mapping images of wide-disperse nanoplates.....                                                                                                                                                                                    | 6 |
| 9. <b>Fig. S9</b> Zeta potential curve of a colloidal dispersion of wide-disperse nanoplates.....                                                                                                                                                                                | 7 |
| 10. <b>Fig. S10</b> Transmittance spectra and the photographs of 19.8 vol% colloidal dispersions of wide-disperse and narrow-disperse nanoplates.....                                                                                                                            | 7 |
| 11. <b>Fig. S11</b> 2D SAXS patterns, the profiles, and $S(q)$ of colloidal dispersions of wide-disperse nanoplates at different concentrations.....                                                                                                                             | 8 |
| 12. <b>Fig. S12</b> 2D SAXS patterns, the profiles, and $S(q)$ of colloidal dispersions of narrow-disperse nanoplates at different concentrations.....                                                                                                                           | 9 |
| 13. <b>Fig. S13</b> $q$ dependences of relaxation rates $\Gamma$ and exponents $\alpha$ for colloidal dispersions of wide-disperse nanoplates at different concentrations.....                                                                                                   | 9 |

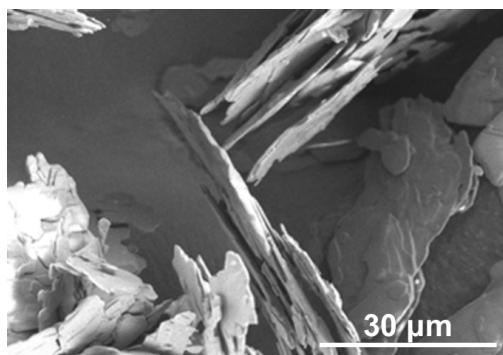

**Fig. S1.** Scanning electron microscopy (SEM) image of two-dimensional (2D) templates prepared in the presence of 0.14 wt% poly(acrylic acid) (PAA).

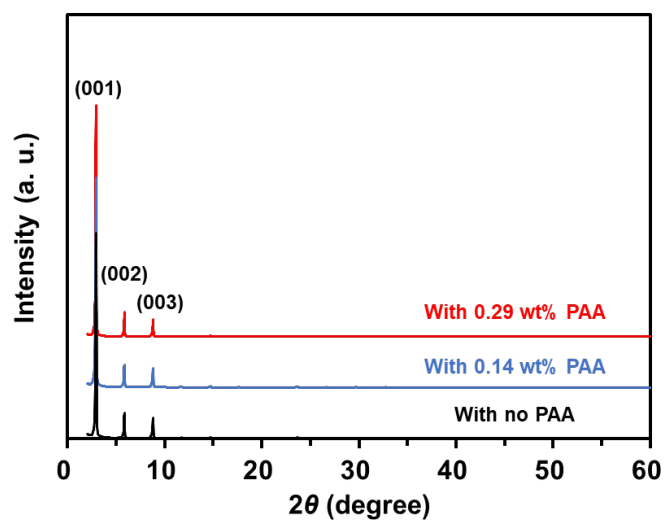

**Fig. S2.** X-ray diffraction (XRD) patterns of 2D templates prepared in the presence of different PAA concentrations of 0 wt%, 0.14 wt% and 0.29 wt%.

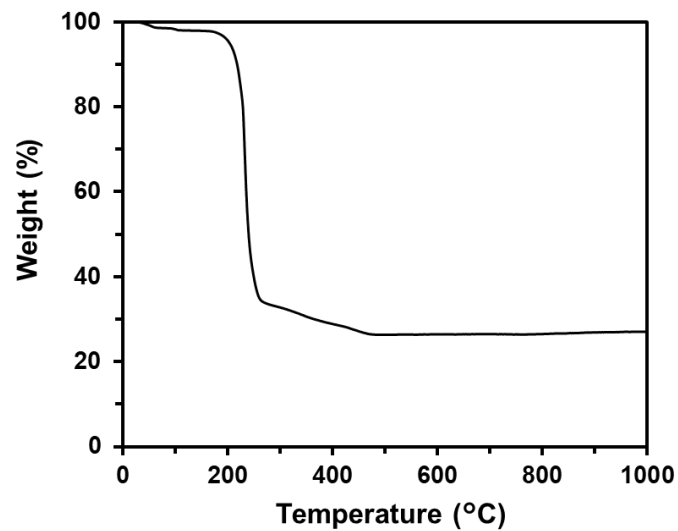

**Fig. S3.** Thermogravimetric (TG) curve of the 2D templates prepared in the presence of 0.14 wt% PAA.

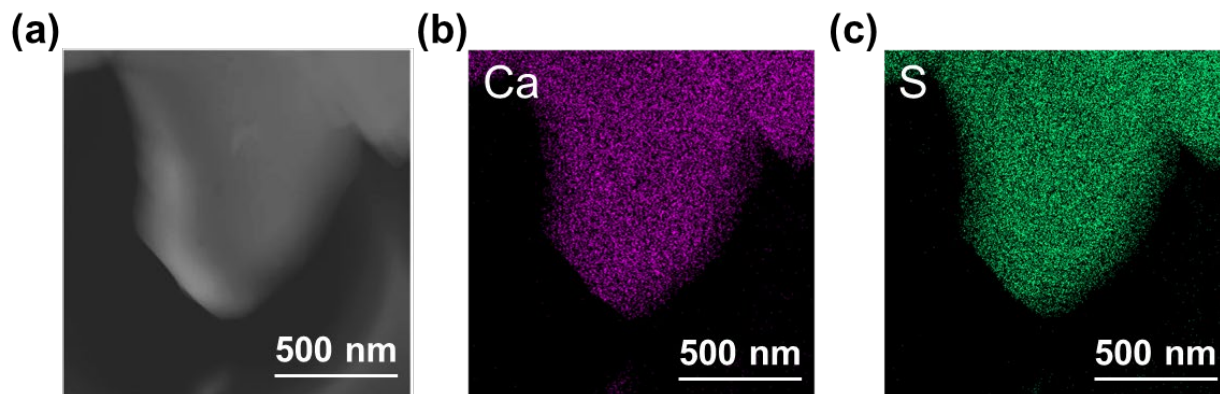

**Fig. S4.** (a) Transmission electron microscopy (TEM) image of a 2D template prepared in the presence of 0.14 wt% PAA and (b,c) the corresponding energy-dispersive X-ray spectroscopy (EDS) elemental mapping images of (b) Ca and (c) S elements.

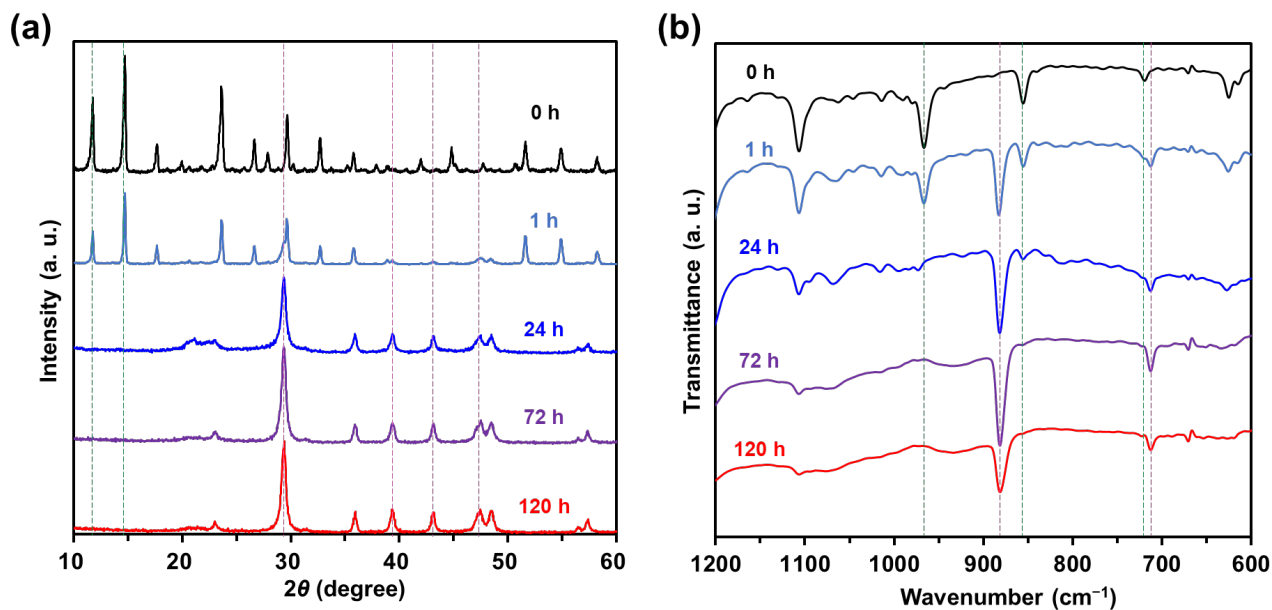

**Fig. S5.** (a, b) Time-dependent evolutions of (a) XRD patterns and (b) Fourier-transform infrared (FTIR) spectra for precipitates collected at different crystallization times after the addition of  $\text{Na}_2\text{CO}_3$  into a dispersion of  $\text{Ca}^{2+}$  layers inside the organic templates. Green and pink dashed lines indicate characteristic peaks for calcium dodecyl sulfonate crystals and calcite crystals, respectively.

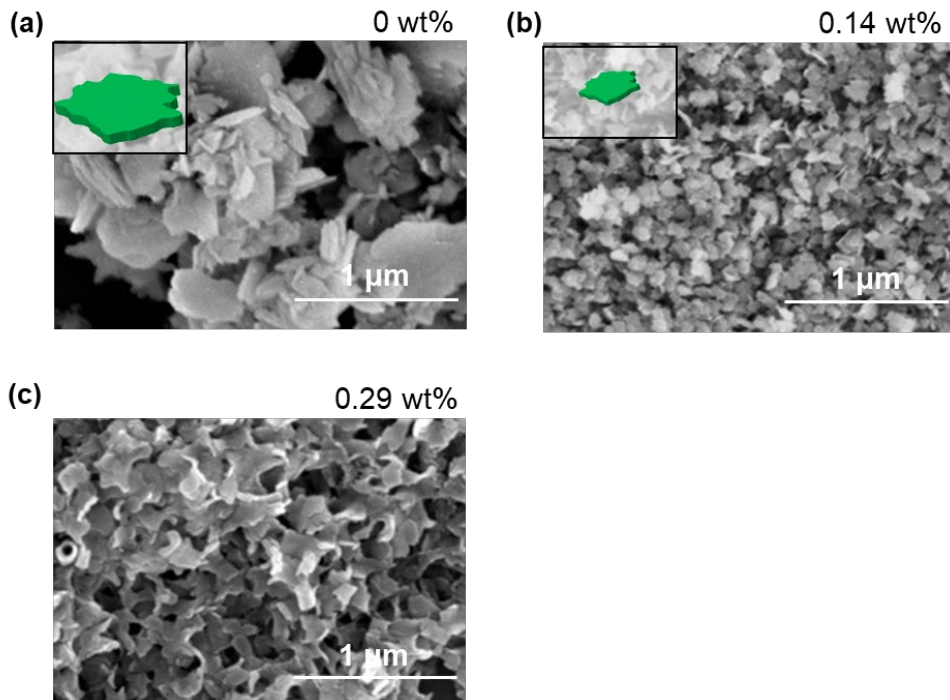

**Fig. S6** SEM images of precipitates prepared at different PAA concentrations of (a) 0 wt%, (b) 0.14 wt%, and (c) 0.29 wt% with the corresponding shape illustration in (a) and (b). All the precipitates were obtained at SDS concentration of 80 mM.

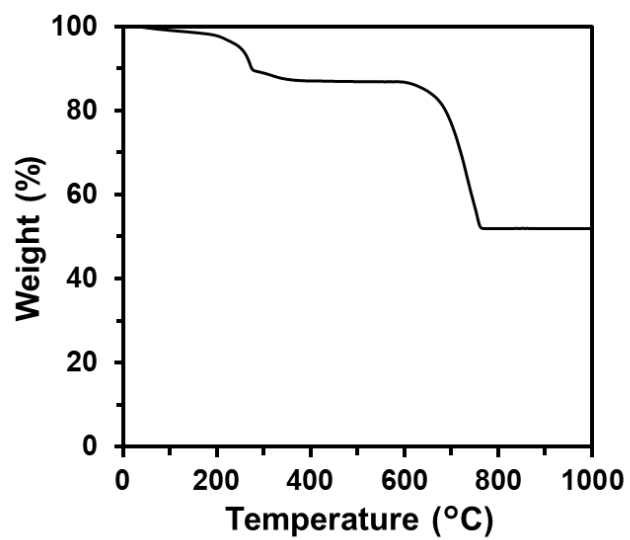

**Fig. S7.** TG curve of wide-disperse nanoplates after drying.

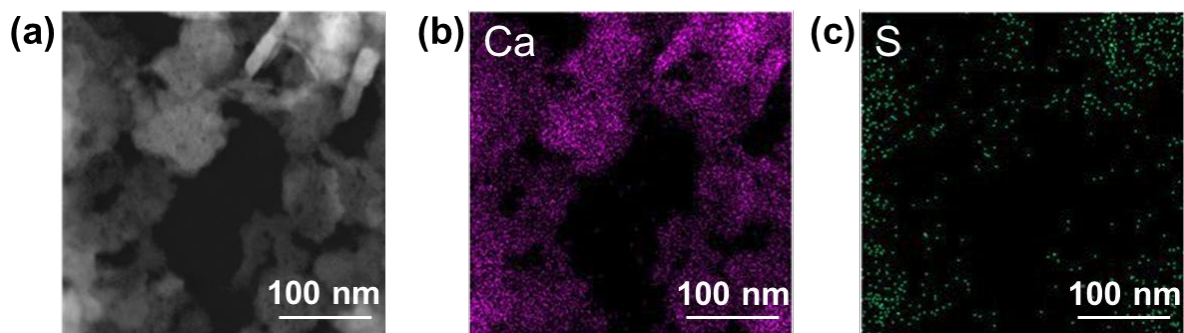

**Fig. S8.** (a) TEM image of wide-disperse nanoplates and the corresponding EDS elemental mapping images of (b) Ca and (c) S elements.

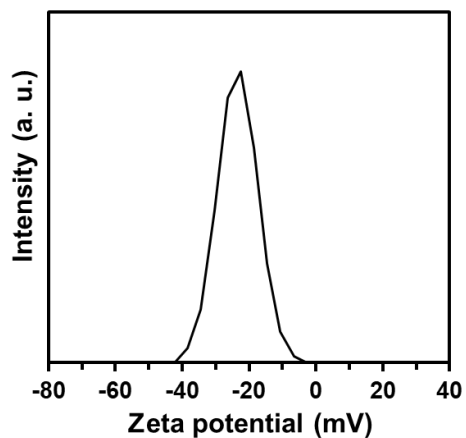

**Fig. S9.** Zeta potential curve of a colloidal dispersion of wide-disperse nanoplates.

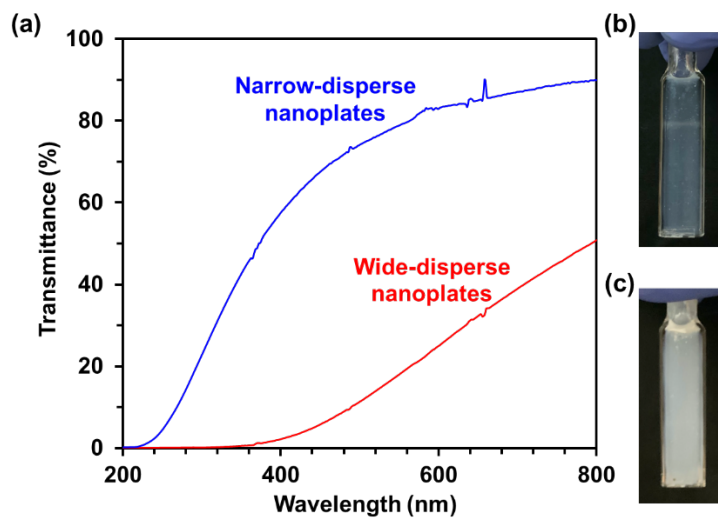

**Fig. S10.** (a) Transmittance spectra of 19.8 vol% colloidal dispersions of wide-disperse and narrow-disperse nanoplates. (b, c) Photographs of the colloidal dispersions of (b) narrow-disperse and (c) wide-disperse nanoplates.

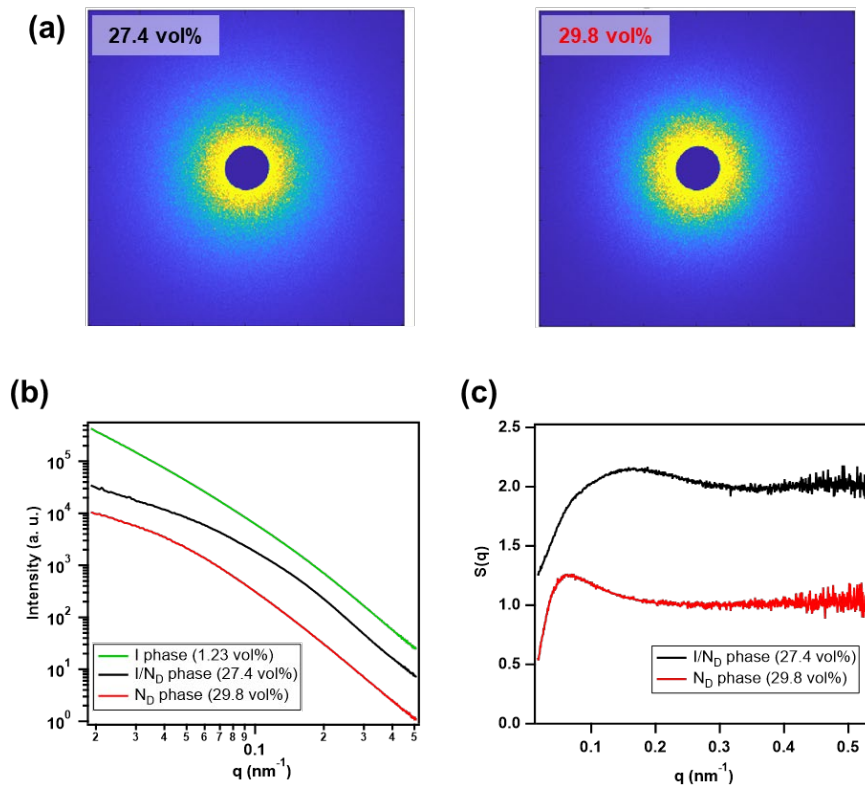

**Fig. S11.** (a) 2D small-angle X-ray scattering (SAXS) patterns of colloidal dispersions of wide-disperse nanoplates at different concentrations of 27.4 vol% and 29.8 vol%. (b) SAXS profiles of colloidal dispersions of wide-disperse nanoplates at different concentrations of 1.23 vol%, 27.4 vol%, and 29.8 vol%. (c) Structure factors  $S(q)$  of colloidal dispersions of wide-disperse nanoplates at different concentrations of 27.4 vol% and 29.8 vol%.



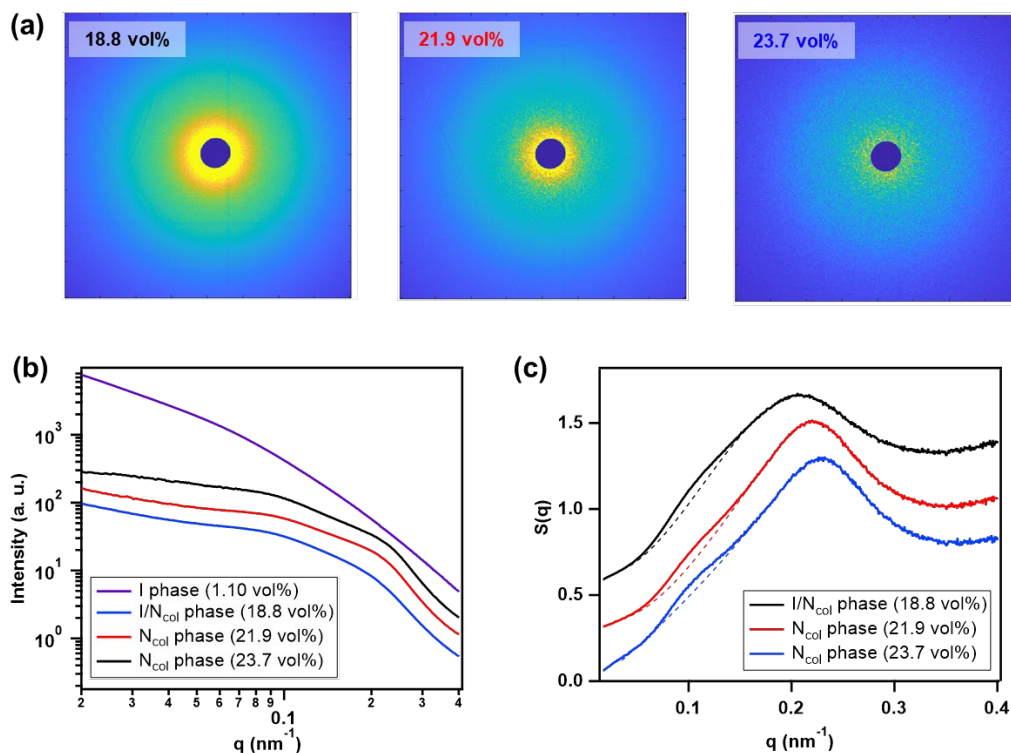

**Fig. S12.** (a) 2D SAXS patterns of colloidal dispersions of narrow-disperse nanoplates at different concentrations of 18.8 vol%, 21.9 vol% and 23.7 vol%. (b) SAXS patterns of colloidal dispersions of narrow-disperse nanoplates at different concentrations of 1.10 vol%, 18.8 vol%, 21.9 vol% and 23.7 vol%. (c) Structure factors  $S(q)$  of colloidal dispersions of narrow-disperse nanoplates at 18.8 vol%, 21.9 vol% and 23.7 vol% with the fitted baselines at around  $q = 0.1 \text{ nm}^{-1}$ .

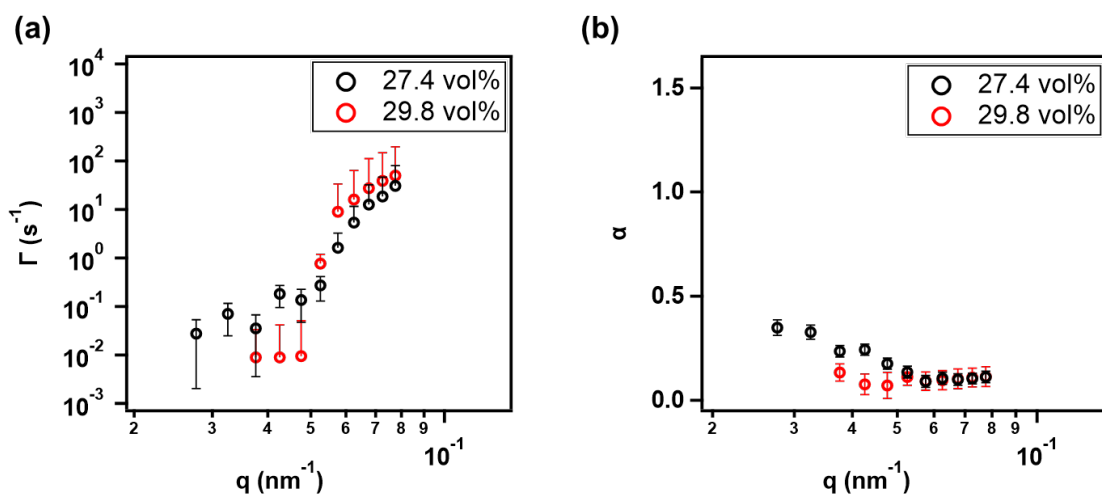

**Fig. S13.** (a)  $q$  dependences of relaxation rates  $\Gamma$  for colloidal dispersions of wide-disperse nanoplates at different concentrations of 27.4 vol% and 29.8 vol%. (b)  $q$  dependences of exponents  $\alpha$  for colloidal dispersions of wide-disperse nanoplates at 27.4 vol% and 29.8 vol%. Some of the downward error bars are omitted in (a) to avoid complicating the drawing.
